# Supplementary material for: Development of a capillary electrophoresis system with Mn(ii) complexes and β-cyclodextrin as the dual chiral selectors for enantioseparation of dansyl amino acids and its application in screening enzyme inhibitors
Source: Royal Society of Chemistry journal article supplement (doi:10.1039/c5ra02744f), 2015-01-01
Supplement: c5ra02744f1.pdf [file c5ra02744f1.pdf]

## Supporting information

### **Development of a capillary electrophoresis system with Mn(II) complexes and $\beta$ -cyclodextrin as the dual chiral selectors for enantioseparation of dansyl amino acids and its application in screening enzyme inhibitors**

**Yuan Su**<sup>1,2</sup>, **Xiaoyu Mu**<sup>1,3</sup>, **Li Qi**<sup>1\*</sup>

<sup>1</sup> Beijing National Laboratory for Molecular Sciences; Key Laboratory of Analytical Chemistry for Living Biosystems, Institute of Chemistry, Chinese Academy of Sciences, 100190 Beijing, P. R. China

<sup>2</sup> Graduate School, Shandong Agricultural University, 271018 Shandong, P. R. China

<sup>3</sup> Graduate School, University of Chinese Academy of Sciences, 19A Yuquanlu, Beijing 100049, P. R. China

\* Correspondence: [qili@iccas.ac.cn](mailto:qili@iccas.ac.cn)

## Characterization of AAILs

### 1. [EMIm][L-Ala]

$^1\text{H-NMR}$ :  $\delta$  = 8.43 (1H, s, CH), 7.41 (2H, d, CH<sub>2</sub>), 7.35 (2H, d, CH<sub>2</sub>), 4.70 (2H, s, CH<sub>2</sub>), 3.47 (H, d, CH), 3.45 (H, d, CH), 1.43 (3H, t, CH<sub>3</sub>), 1.28 (3H, d, CH<sub>3</sub>) ppm.

$^{13}\text{C NMR}$ :  $\delta$  = 178.4, 129.80, 123.38, 121.80, 50.98, 44.72, 35.51, 18.20, 14.41 ppm

### 2. [BMIm][L-Ala]

$^1\text{H-NMR}$  :  $\delta$  = 8.85 (1H, s, CH), 7.40 (1H, d, CH), 7.38 (1H, d, CH), 3.82 (3H, s, CH<sub>3</sub>), 3.42 (3H, d, CH), 3.38 (3H, d, CH), 1.80 (2H, t, CH<sub>2</sub>), 1.78 (2H, t, CH<sub>2</sub>), 1.76 (2H, t, CH<sub>2</sub>), 1.28 (2H, m, CH<sub>2</sub>), 1.25 (2H, m, CH<sub>2</sub>), 1.23 (2H, m, CH<sub>2</sub>), 0.86 (3H, t, CH<sub>3</sub>), 0.84 (3H, t, CH<sub>3</sub>) ppm.

$^{13}\text{C NMR}$ :  $\delta$  = 178.9, 130.23, 123.4, 122.15, 51.12, 49.22, 35.51, 31.21, 19.98, 18.71, 12.57 ppm

### 3. [HMIm][L-Ala]

$^1\text{H-NMR}$  :  $\delta$  = 8.41 (1H, s, CH), 7.41 (1H, d, CH), 7.36 (1H, d, CH), 3.83 (3H, s, CH<sub>3</sub>), 3.35 (H, m, CH), 3.33 (H, m, CH), 1.80 (2H, m, CH<sub>2</sub>), 1.24 (2H, m, CH<sub>2</sub>), 1.22 (2H, m, CH<sub>2</sub>), 1.21 (2H, t, CH<sub>2</sub>), 0.81 (3H, t, CH<sub>3</sub>) ppm.

$^{13}\text{C NMR}$ :  $\delta$  = 179.2, 131.23, 123.41, 122.15, 51.25, 49.52, 35.55, 30.29, 30.10, 24.94, 21.78, 19.47, 13.17 ppm

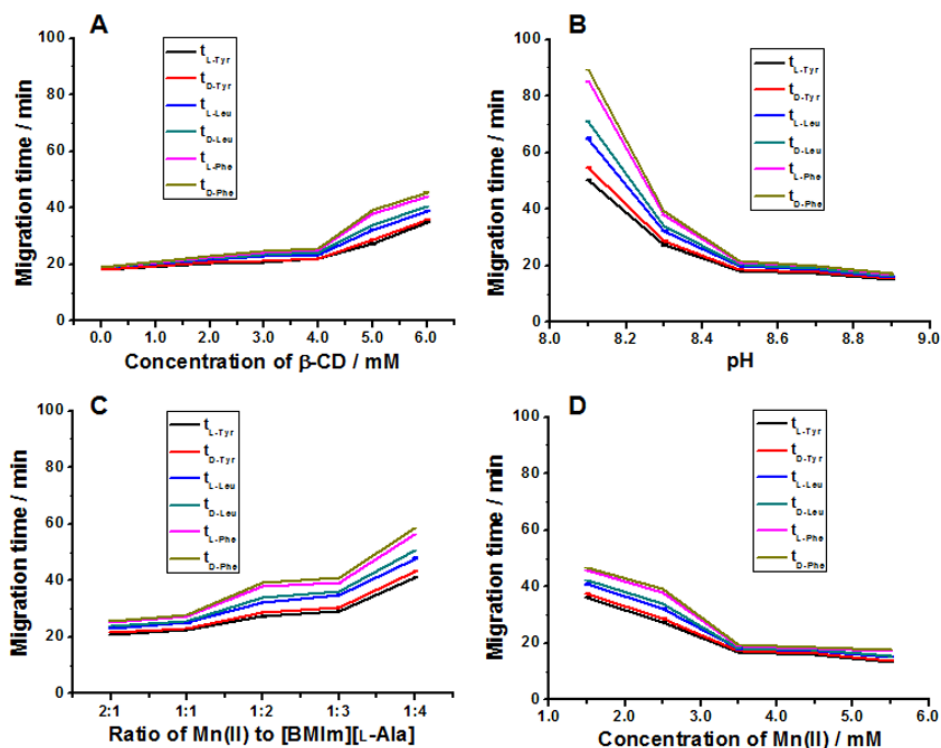

**Fig. S1.** **A.** Influence of  $\beta$ -CD concentrations on migration times. Buffer conditions: 100.0 mM boric acid, 5.0 mM  $\text{NH}_4\text{AC}$ , 2.5 mM Mn(II), 5.0 mM [BMIm][L-Ala], adjusted pH at 8.3, and different concentrations of  $\beta$ -CD ranging from 0-6.0 mM. **B.** Influence of pH on migration times. Buffer conditions: 100.0 mM boric acid, 5.0 mM  $\text{NH}_4\text{AC}$ , 2.5 mM Mn(II), 5.0 mM [BMIm][L-Ala] and 5.0 mM  $\beta$ -CD at different pH values. **C.** Influence of concentration ratio of Mn(II) to [BMIm][L-Ala] on migration times. Buffer conditions: 100.0 mM boric acid, 5.0 mM  $\text{NH}_4\text{AC}$ , 5.0 mM  $\beta$ -CD, the concentration ratio of Mn(II) to [BMIm][L-Ala] was from 2: 1 to 1: 4 with Mn(II) kept at 2.5 mM, adjusted pH to 8.3. **D.** Influence of complex concentrations on migration times. Buffer conditions: 100.0 mM boric acid, 5.0 mM  $\text{NH}_4\text{AC}$ , 5.0 mM  $\beta$ -CD and different concentrations of Mn(II) complex with [BMIm][L-Ala] in the range of 1.5-5.5 mM, the ratio of Mn(II) to [BMIm][L-Ala] was kept at 1:2, adjusted pH at 8.3. Capillary: 60 cm, 45 cm effective  $\times$  75  $\mu\text{m}$  id; injection: siphoned for 8 s at 15 cm; voltage: -23 KV; UV detection: 254 nm; temperature: 25  $^\circ\text{C}$ .

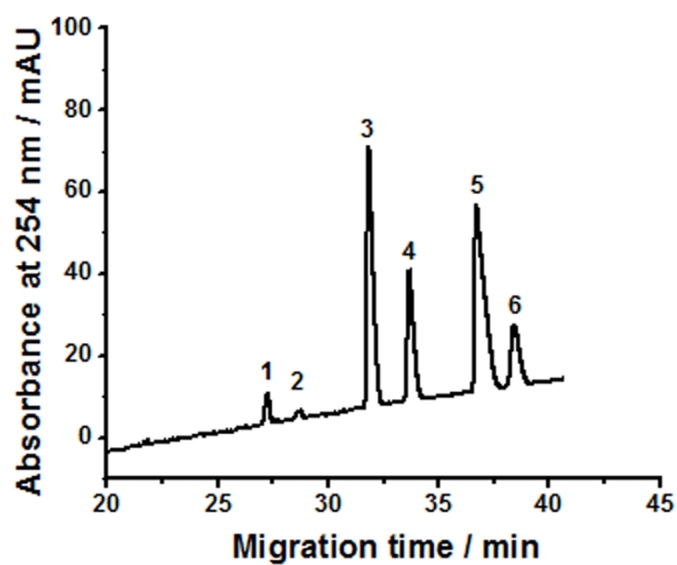

**Fig. S2.** Enantioseparation of Dns-D,L-Tyr, Dns-D,L-Leu, Dns-D,L-Phe. For the Dns-D,L-AAs, the concentration of L-AA is twice as large as D-AA. Buffer conditions: 100.0 mM boric acid, 5.0 mM ammonium acetate, 2.5 mM Mn(II), 5.0 mM [BMIm][L-Ala] and 5.0mM  $\beta$ -CD at pH 8.3. Other conditions are the same as **Fig. S1**.

Peaks: **1.** Dns-L-Tyr, **2.** Dns-D-Tyr, **3.** Dns-L-Leu, **4.** Dns-D-Leu, **5.** Dns-L-Phe, **6.** Dns-D-Phe.

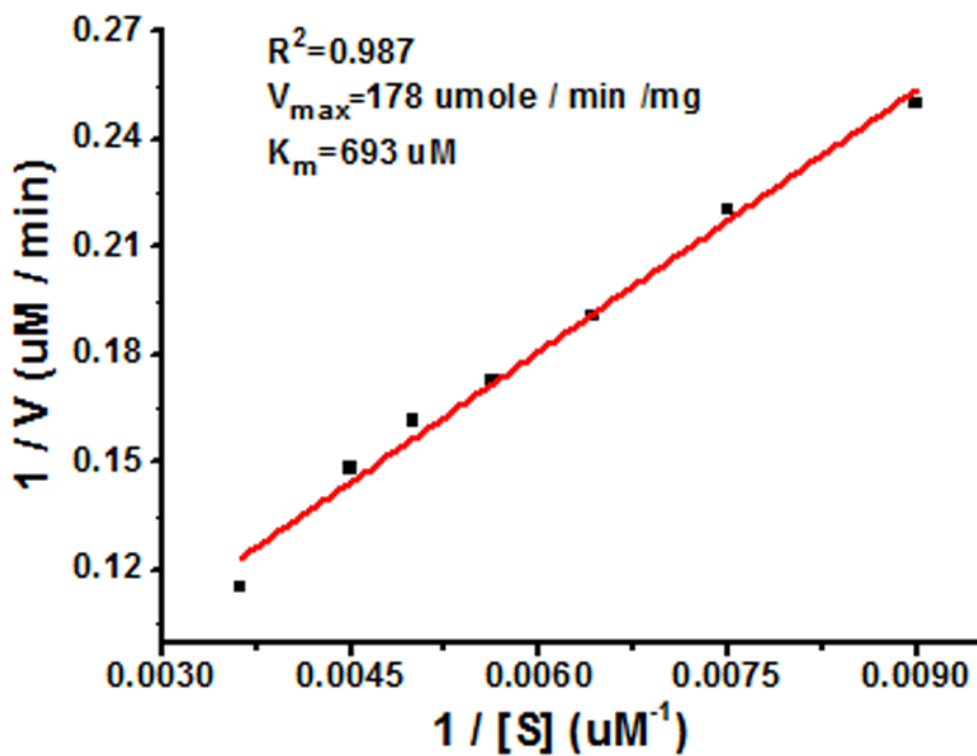

**Fig. S3.** Line weaver–Burk plot for the oxidation of L-Tyr catalyzed by tyrosinase (565 U/mg). The Michaelis–Menten equation was described as:  $V = V_{\max} [S] / (K_m + [S])$ , where [S] is the concentration of the substrate.

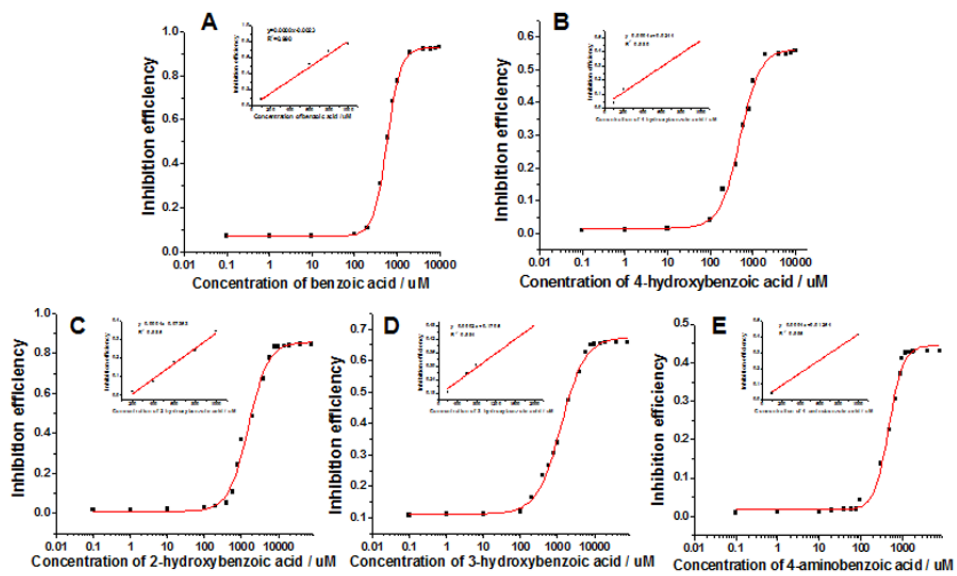

**Fig. S4.** Tyrosinase inhibition efficiency of different inhibitors: **A.** Benzoic acid; **B.** 4-hydroxybenzoic acid; **C.** 2-hydroxybenzoic acid; **D.** 3-hydroxybenzoic acid; **E.** 4-aminobenzoic acid. The insert graphs represent the linear plot. Incubation condition: 333  $\mu$ M L-Tyr as the substrate and different concentration to incubate with tyrosinase.

**Table S1.** Enantioseparation of Dns-D,L-AAs with different running buffer solutions<sup>a</sup>

| Dns-D,L-AAs  | Mn-[BMIm][L-Ala] |                     |                     |            | $\beta$ -CD     |                     |                     |            |
|--------------|------------------|---------------------|---------------------|------------|-----------------|---------------------|---------------------|------------|
|              | Rs <sup>b</sup>  | t <sub>L</sub> /min | t <sub>D</sub> /min | $\alpha^c$ | Rs <sup>b</sup> | t <sub>L</sub> /min | t <sub>D</sub> /min | $\alpha^c$ |
| Dns-D,L- Thr | 0                | 20.62               | 20.62               | 1.000      | 1.45            | 8.13                | 8.24                | 1.014      |
| Dns-D,L-Val  | 0                | 20.58               | 20.58               | 1.000      | 1.17            | 7.53                | 7.62                | 1.012      |
| Dns-D,L-Tyr  | 0                | 21.74               | 21.74               | 1.000      | 1.44            | 8.22                | 8.33                | 1.013      |
| Dns-D,L-Leu  | 0                | 26.27               | 26.27               | 1.000      | 1.25            | 7.95                | 8.04                | 1.011      |
| Dns-D,L-Ile  | 0                | 21.85               | 22.20               | 1.000      | 0.72            | 7.36                | 7.42                | 1.008      |
| Dns-D,L-Pro  | 0                | 21.75               | 21.75               | 1.000      | 1.11            | 7.82                | 7.89                | 1.009      |
| Dns-D,L-Met  | 0                | 22.58               | 22.58               | 1.000      | 0.63            | 8.33                | 8.40                | 1.008      |
| Dns-D,L-Ser  | 0                | 20.31               | 20.31               | 1.000      | 0.39            | 9.92                | 9.99                | 1.007      |
| Dns-D,L-His  | 0                | 29.81               | 29.81               | 1.000      | 0.66            | 7.34                | 7.38                | 1.005      |
| Dns-D,L-Phe  | 0                | 28.02               | 28.02               | 1.000      | 0               | 8.35                | 8.35                | 1.000      |
| Dns-D,L-Ala  | 0                | 18.05               | 18.05               | 1.000      | 0.62            | 8.24                | 8.28                | 1.005      |
| Dns-D,L-Asn  | 0                | 20.80               | 20.80               | 1.000      | 0.45            | 7.94                | 7.99                | 1.006      |
| Dns-D,L-Trp  | 0                | 24.88               | 24.88               | 1.000      | 0.63            | 7.56                | 7.60                | 1.005      |
| Dns-D,L-Gln  | 0                | 24.34               | 24.34               | 1.000      | 0               | 8.36                | 8.36                | 1.000      |
| Dns-D,L-Orn  | 0                | 33.94               | 33.94               | 1.000      | 0               | 9.40                | 9.40                | 1.000      |
| Dns-D,L-Glu  | 0                | 19.49               | 19.49               | 1.000      | 0               | 9.17                | 9.17                | 1.000      |
| Dns-D,L-Arg  | 0                | 16.05               | 16.05               | 1.000      | 0               | 9.05                | 9.05                | 1.000      |
| Dns-D,L-Asp  | 0.43             | 14.61               | 14.73               | 1.008      | 0               | 9.18                | 9.18                | 1.000      |
| Dns-D,L-Cys  | 0                | 15.52               | 15.52               | 1.000      | 0               | 8.83                | 8.83                | 1.000      |
| Dns-D,L-Lys  | 0                | 33.32               | 33.32               | 1.000      | 1.30            | 5.54                | 5.70                | 1.029      |

<sup>a</sup> Running buffer: 100.0 mM boric acid, 5.0 mM NH<sub>4</sub> AC without  $\beta$ -CD or without Mn(II)-[BMIm][L-Ala] complex at pH 8.3. Other conditions are the same as in Fig. S1.

<sup>b</sup> Rs = 2(t<sub>D</sub>-t<sub>L</sub>)/(W<sub>D</sub> + W<sub>L</sub>); t: migration time

<sup>c</sup>  $\alpha$  = t<sub>L</sub> / t<sub>D</sub>; t: migration time

**Table S2.** Enantioseparation of Dns-D,L-AAs with different kinds of CDs<sup>a</sup>

| CDs                           | Dns-D,L-Tyr            |                            |                            |                       | Dns-D,L-Leu            |                            |                            |                       | Dns-D,L-Phe            |                            |                            |                       |
|-------------------------------|------------------------|----------------------------|----------------------------|-----------------------|------------------------|----------------------------|----------------------------|-----------------------|------------------------|----------------------------|----------------------------|-----------------------|
|                               | <i>Rs</i> <sup>b</sup> | <i>t</i> <sub>L</sub> /min | <i>t</i> <sub>D</sub> /min | $\alpha$ <sup>c</sup> | <i>Rs</i> <sup>b</sup> | <i>t</i> <sub>L</sub> /min | <i>t</i> <sub>D</sub> /min | $\alpha$ <sup>c</sup> | <i>Rs</i> <sup>b</sup> | <i>t</i> <sub>L</sub> /min | <i>t</i> <sub>D</sub> /min | $\alpha$ <sup>c</sup> |
| <b><math>\alpha</math>-CD</b> | 0                      | 18.99                      | 18.99                      | 1.000                 | 0                      | 22.32                      | 22.32                      | 1.000                 | 0                      | 26.10                      | 26.10                      | 1.000                 |
| <b><math>\beta</math>-CD</b>  | 4.06                   | 27.18                      | 28.71                      | 1.056                 | 3.50                   | 32.19                      | 34.13                      | 1.060                 | 1.78                   | 37.77                      | 39.28                      | 1.040                 |
| <b><math>\gamma</math>-CD</b> | 4.22                   | 50.31                      | 54.56                      | 1.084                 | 3.75                   | 64.95                      | 71.08                      | 1.094                 | 1.86                   | 85.18                      | 89.40                      | 1.050                 |

<sup>a</sup> Running buffer: 100.0 mM boric acid, 5.0 mM NH<sub>4</sub> AC, 2.5 mM Mn(II), 5.0 mM [BMIm][L-Ala], adjusted pH at 8.3, and different kinds of CDs. Other conditions are the same as in **Fig. S1**.

<sup>b</sup>  $Rs = 2(t_D - t_L)/(W_D + W_L)$ ; *t*: migration time

<sup>c</sup>  $\alpha = t_L / t_D$ ; *t*: migration time..



**Table S3. Optimization of separation condition on  $\alpha^a$**

| Conditions                                            |                  | $\alpha$    |             |             |
|-------------------------------------------------------|------------------|-------------|-------------|-------------|
|                                                       |                  | Dns-D,L-Tyr | Dns-D,L-Leu | Dns-D,L-Phe |
| pH                                                    | 8.1              | 1.084       | 1.090       | 1.050       |
|                                                       | 8.3              | 1.056       | 1.060       | 1.040       |
|                                                       | 8.5              | 1.028       | 1.027       | 1.017       |
|                                                       | 8.7              | 1.023       | 1.023       | 1.017       |
|                                                       | 8.9              | 1.017       | 1.018       | 1.015       |
| ratio of Mn(II) to [BMIm][L-Ala]                      | 2:1              | 1.033       | 1.031       | 1.017       |
|                                                       | 1:1              | 1.034       | 1.031       | 1.017       |
|                                                       | 1:2              | 1.056       | 1.060       | 1.040       |
|                                                       | 1:3              | 1.058       | 1.061       | 1.048       |
|                                                       | 1:4              | 1.060       | 1.063       | 1.050       |
| concentrations of Mn(II)-[BMIm][L-Ala] complexes / mM | 1.5              | 1.059       | 1.062       | 1.041       |
|                                                       | 2.5              | 1.056       | 1.060       | 1.040       |
|                                                       | 3.5              | 1.025       | 1.025       | 1.021       |
|                                                       | 4.5              | 1.024       | 1.024       | 1.016       |
|                                                       | 5.5              | 1.018       | 1.019       | 1.0150      |
| concentration of $\beta$ -CD / mM                     | 0                | 0           | 0           | 0           |
|                                                       | 1.0              | 1.009       | 1.001       | 1.015       |
|                                                       | 2.0              | 1.009       | 1.011       | 1.017       |
|                                                       | 3.0              | 1.012       | 1.013       | 1.018       |
|                                                       | 4.0              | 1.014       | 1.024       | 1.022       |
|                                                       | 5.0              | 1.056       | 1.060       | 1.040       |
|                                                       | 6.0              | 1.067       | 1.065       | 1.042       |
| Different AAILs                                       | [EMIM][L-Ala]    | 1.033       | 1.031       | 1.018       |
|                                                       | [BMIM][L-Ala]    | 1.056       | 1.060       | 1.040       |
|                                                       | [HMIM][L-Ala]    | 1.084       | 1.094       | 1.050       |
|                                                       | L-Ala            | 1.018       | 1.030       | 1.017       |
|                                                       | L-Ala+[BMIm][Br] | 1.038       | 1.041       | 1.018       |

<sup>a</sup>  $\alpha = t_L / t_D$ ; t: migration time..
